# Supplementary material
Source: publisher site journal article supplement (https://www.degruyterbrill.com/publication/serial_code/LEXSM-B/downloadAsset/LEXSM-B_Flyer%20LEX%20LEXSM.pdf)
Supplement: Supplementary file 1 [file LEXSM-B_Flyer%20LEX%20LEXSM.pdf]

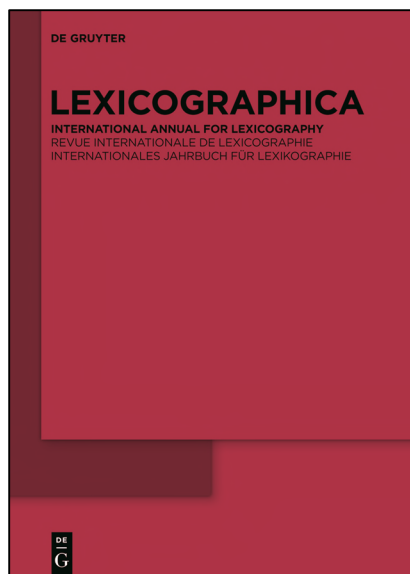

PUBLISHED SINCE 1985

1 ISSUE PER YEAR  
ISSN 0175-6206  
e-ISSN 1865-9403

LANGUAGES OF PUBLICATION  
English, German, French

## LEXICOGRAPHICA

International Annual for Lexicography /  
Revue Internationale de Lexicographie /  
Internationales Jahrbuch für Lexikographie

Published annually since 1985, this international yearbook covers all topics in the field of lexicography, including e.g. dictionary making, lexicographic theory, the history of lexicography, as well as computational lexicography. It publishes articles on monolingual and bilingual lexicography, for both general language and specialized languages. Each yearbook contains a thematic part with detailed articles selected from a specific call. In addition, each volume includes submitted articles on any lexicographic topic, conference reports, book reviews and notes on lexicography in higher education. Articles are in English, German and some also in French, reviewed by at least two of the editors.

### EDITED BY

Laura Giacomini, Rufus H. Gouws, Ulrich Heid, Thomas Herbst,  
Anja Lobenstein-Reichmann, Stefan J. Schierholz and Wolfgang Schweickard

### EDITORIAL BOARD

Éva Buchi, Idalete Maria da Silva Dias, Stefan Engelberg, Gaëtanelle Gilquin,  
Martina Nied Curcio, Angelika Storrer

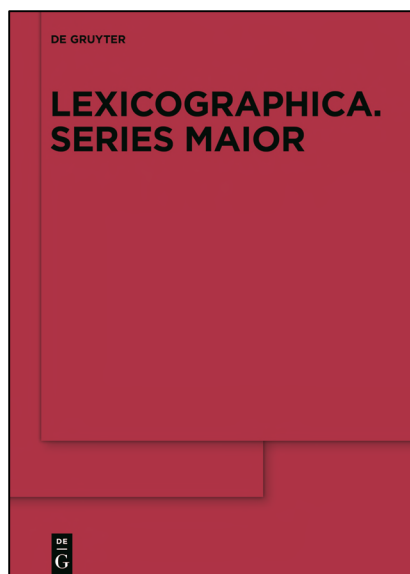

PUBLISHED SINCE 1984

ISSN  
0175-9264

LANGUAGES OF PUBLICATION  
English, German

## LEXICOGRAPHICA. Series Maior

Supplementary Volumes to the International Annual for  
Lexicography / Suppléments à la Revue Internationale de  
Lexicographie / Supplementbände zum Internationalen  
Jahrbuch für Lexikographie

*Lexicographica. Series Maior* features monographs and edited volumes on the topics of lexicography and meta-lexicography. Works from the broader domain of lexicology are also included, provided they strengthen the theoretical, methodological and empirical basis of lexicography and meta-lexicography. The more than 160 books published in the series since its founding in 1984 clearly reflect the main themes and developments of the field. The publications focus on aspects of lexicography such as micro- and macrostructure, typology, history of the discipline and application-oriented lexicographical documentation.

### EDITED BY

Laura Giacomini, Rufus H. Gouws, Ulrich Heid, Thomas Herbst,  
Anja Lobenstein-Reichmann, Oskar Reichmann, Stefan J. Schierholz  
and Wolfgang Schweickard

### EDITORIAL BOARD

Éva Buchi, Idalete Maria da Silva Dias, Stefan Engelberg, Gaëtanelle Gilquin,  
Martina Nied Curcio, Angelika Storrer
